# Supplementary material for: Experimental connections between aqueous–aqueous and aqueous–ionic liquid biphasic systems
Source: Royal Society of Chemistry journal article supplement (doi:10.1039/c4ra00645c), 2014-01-01
Supplement: c4ra00645c1.pdf [file c4ra00645c1.pdf]

## Supplementary materials

### NMR protocol

From the possible nucleus ( $^{13}\text{C}$ ,  $^1\text{H}$ ,  $^{15}\text{N}$ ,  $^{33}\text{S}$  and  $^{19}\text{F}$ ) available in the moieties under study,  $^1\text{H}$  and  $^{19}\text{F}$  have the best response in NMR<sup>1, 2</sup> and were thus selected. All spectra were recorded on a Bruker 300MHz located at the Institut de Chimie, Strasbourg University, France, with a probe 5 mm QNP 1H/13C/31P/19F Z-GRD. For  $\text{C}_1\text{C}_4\text{im}^+$  and  $\text{C}_1\text{C}_{10}\text{im}^+$  determination, we chose sodium citrate as the internal standard<sup>2, 3</sup> because its protons are well separated from those of the IL cation under investigation. For  $\text{Me}_3\text{BuN}^+$  we chose sodium-potassium tartrate<sup>2</sup> as internal standard. Sodium trifluoroacetate<sup>4</sup> was used as standard for  $\text{Tf}_2\text{N}^-$  determination. The standards were introduced together with the sample in the NMR tube.

In order to perform a reliable quantitative determination of concentrations, it is very important that all spins have relaxed in between two excitation pulses. The longitudinal relaxation times,  $T_1$ , for  $^1\text{H}$  and  $^{19}\text{F}$  samples and standards should thus be carefully determined as a function of the chemical conditions that may influence their values. However, no NMR signal could be obtained above  $[\text{D}^+][\text{NO}_3^-] = 3 \text{ M}$  so that we performed the  $T_1$  determinations in pure  $\text{D}_2\text{O}$  (no  $[\text{D}^+][\text{NO}_3^-]$  added) and in  $3\text{M } [\text{D}^+][\text{NO}_3^-]/\text{D}_2\text{O}$  only. The values displayed in table S1 show that  $T_1$  values depend on the nature of the sample, as is well-known. The effect of the varying ionic strength of the samples onto the NMR characteristics is twofold: i) for  $^1\text{H}$ , the chemical shifts are markedly displaced downwards as  $[\text{D}^+][\text{NO}_3^-]_{\text{init}}$  is increased (from 7.3 ppm to 6.4 ppm), while this effect is almost negligible for  $^{19}\text{F}$ . ii) the relaxation times  $T_1$  are a decreasing function of  $[\text{D}^+][\text{NO}_3^-]_{\text{init}}$ . Considering these values, in order to avoid artificial distortions of the signal intensities<sup>5</sup> and to limit the acquisition time, the NMR spectra were recorded with a  $30^\circ$  excitation pulse. All acquisition parameters are indicated in table S2. For  $^1\text{H}$  NMR, the spectral window was 0 to 15 ppm, while for  $^{19}\text{F}$  it was centred at -80 ppm, with a width of 80 ppm, to limit background acquisition. Data processing included apodization with an exponential broadening of 1 Hz, phase and baseline corrections. Linearity was checked (correlation coefficient above 0.99) for both  $^1\text{H}$  and  $^{19}\text{F}$  by adding known amounts of  $[\text{Me}_3\text{BuN}^+][\text{Br}^-]$ ,  $[\text{C}_1\text{C}_4\text{im}^+][\text{Cl}^-]$ ,  $[\text{C}_1\text{C}_{10}\text{im}^+][\text{Cl}^-]$  and  $[\text{Li}^+][\text{Tf}_2\text{N}^-]$  in pure  $\text{D}_2\text{O}$  and  $\text{D}_2\text{O}/[\text{D}^+][\text{NO}_3^-]$  (3M).

Concentrations were calculated using the analyte peak integration, including the peaks due to the  $^{13}\text{C}$ - $^1\text{H}$  or  $^{13}\text{C}$ - $^{19}\text{F}$  couplings ( $\text{C}_1\text{C}_4\text{im}^+$ : B protons,  $\delta = 7.4$  to 6.4 ppm;  $\text{C}_1\text{C}_{10}\text{im}^+$ : same B protons,  $\delta = 7.0$  to 7.9 ppm;  $\text{Me}_3\text{BuN}^+$ : C protons,  $\delta = 1.7$  to 0.7 ppm;  $\text{Tf}_2\text{N}^-$ :  $\delta = -79$  ppm,<sup>6</sup> see scheme 1 for proton attribution) and the internal standard peak integration, each corrected from the number of contributing nuclei, taking advantage of the formula given in <sup>7</sup>. Purity of the standards was taken into account in the calculations. With this protocol, the uncertainty on the cation concentrations is equal to 10% and to 5% for anions, with detection limits equal to 1 mM for each compound.

| Cations/anions                                            | T <sub>1</sub> in pure D <sub>2</sub> O (s) | T <sub>1</sub> in 3M DNO <sub>3</sub> /D <sub>2</sub> O (s) |
|-----------------------------------------------------------|---------------------------------------------|-------------------------------------------------------------|
| C <sub>1</sub> C <sub>4</sub> mim <sup>+</sup> protons B  | 6.06 ± 0.28 (δ = 7.37 ppm)                  | 3.81 ± 0.30 (δ = 6.44 ppm)                                  |
| Doublet of doublet                                        | 7.20 ± 0.37 (δ = 7.33 ppm)                  | 4.09 ± 0.30 (δ = 6.40 ppm)                                  |
| C <sub>1</sub> C <sub>10</sub> mim <sup>+</sup> protons B | 3.13 ± 0.13 (δ = 7.38 ppm)                  | 2.34 ± 0.15 (δ = 6.38 ppm)                                  |
| Doublet of doublet                                        | 2.88 ± 0.11 (δ = 7.38 ppm)                  | 1.80 ± 0.11 (δ = 6.32 ppm)                                  |
| Me <sub>3</sub> BuN <sup>+</sup> protons C                | 2.06 ± 0.15 (δ = 1.67 ppm)                  | 1.82 ± 0.16 (δ = 0.75 ppm)                                  |
| sodium citrate 4 protons                                  | 0.653 ± 0.074 (δ = 2.53 ppm)                | 0.508 ± 0.062 (δ = 2.06 ppm)                                |
| Doublet of doublet                                        | 0.627 ± 0.077 (δ = 2.44 ppm)                | 0.498 ± 0.059 (δ = 1.94 ppm)                                |
| sodium-potassium tartrate<br>2 protons                    | 5.63 ± 0.13 (δ = 4.22 ppm)                  | 3.41 ± 0.13 (δ = 3.83 ppm)                                  |
| Tf <sub>2</sub> N <sup>-</sup>                            | 2.01 ± 0.61 (δ = -80.1 ppm)                 | 2.33 ± 0.23 (δ = -81.7 ppm)                                 |
| sodium trifluoroacetate                                   | 2.13 ± 0.19 (δ = -76.5 ppm)                 | 2.55 ± 0.17 (δ = -78.6 ppm)                                 |

Table S1: Values of the relaxation times T<sub>1</sub>. In brackets: chemical shift of the <sup>1</sup>H or <sup>19</sup>F nuclei.

| ion                                             | Number of scans | Delay (s) | Record time (s) | Signal recovery (%) |
|-------------------------------------------------|-----------------|-----------|-----------------|---------------------|
| Tf <sub>2</sub> N <sup>-</sup>                  | 150             | 0.45      | 3               | 96.5                |
| C <sub>1</sub> C <sub>4</sub> mim <sup>+</sup>  | 32              | 22        | 2.7             | 99.6                |
| C <sub>1</sub> C <sub>10</sub> mim <sup>+</sup> | 32              | 15        | 2.7             | 99.9                |
| Me <sub>3</sub> BuN <sup>+</sup>                | 32              | 15        | 2.7             | 99.9                |

Table S2: NMR acquisition parameters with a 30° excitation pulse

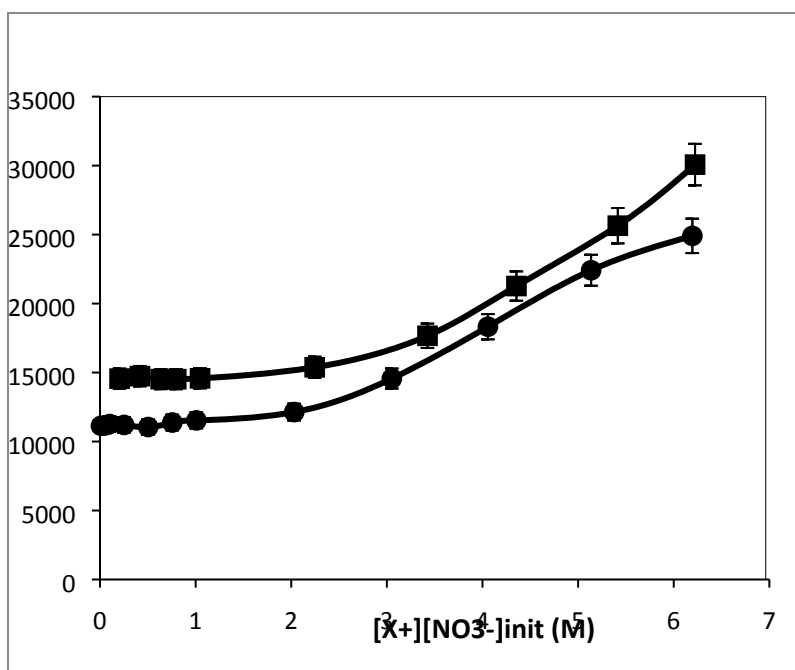

Fig. S1: Water amount for (■):  $\text{H}_2\text{O}/[\text{H}^+][\text{NO}_3^-]/[\text{C}_1\text{C}_4\text{im}^+][\text{Tf}_2\text{N}^-]$ ; (●):  $\text{D}_2\text{O}/[\text{D}^+][\text{NO}_3^-]/[\text{C}_1\text{C}_4\text{im}^+][\text{Tf}_2\text{N}^-]$ . Solid lines are guide for the eye only.

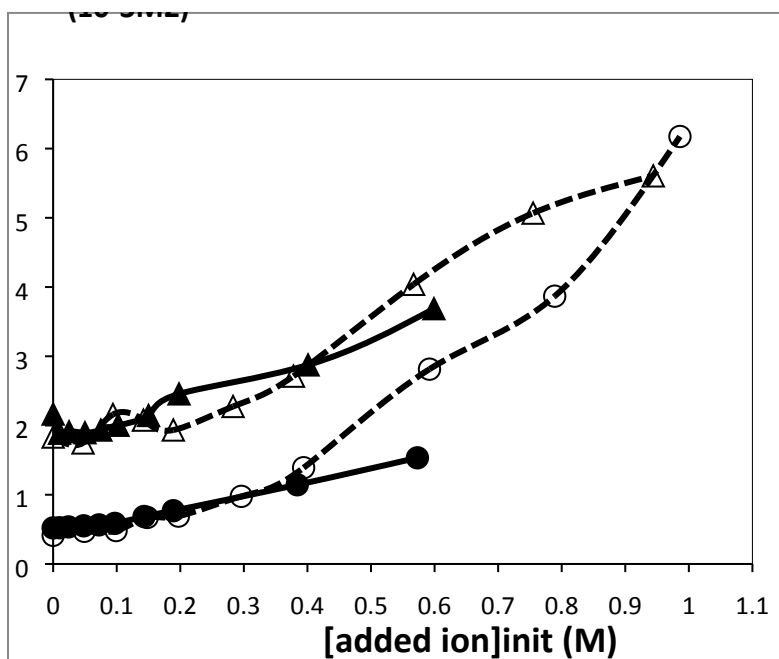

Fig. S2. Variation of the solubility product,  $k_s = [\text{C}_1\text{C}_4\text{im}^+][\text{Tf}_2\text{N}^-]$  for samples S#4 – S#7 as a function of the added ion. (▲):  $[\text{D}^+][\text{NO}_3^-] = 2.2 \text{ M}$ ,  $[\text{C}_1\text{C}_4\text{im}^+][\text{Cl}^-]$  added. (Δ):  $[\text{D}^+][\text{NO}_3^-] = 2.2 \text{ M}$ ,  $[\text{Li}^+][\text{Tf}_2\text{N}^-]$  added. (●):  $[\text{D}^+][\text{NO}_3^-] = 0.35 \text{ M}$ ,  $[\text{C}_1\text{C}_4\text{im}^+][\text{Cl}^-]$  added. (○):  $[\text{D}^+][\text{NO}_3^-] = 0.35 \text{ M}$ ,  $[\text{Li}^+][\text{Tf}_2\text{N}^-]$  added. Solid and dotted lines are guide for the eye only.

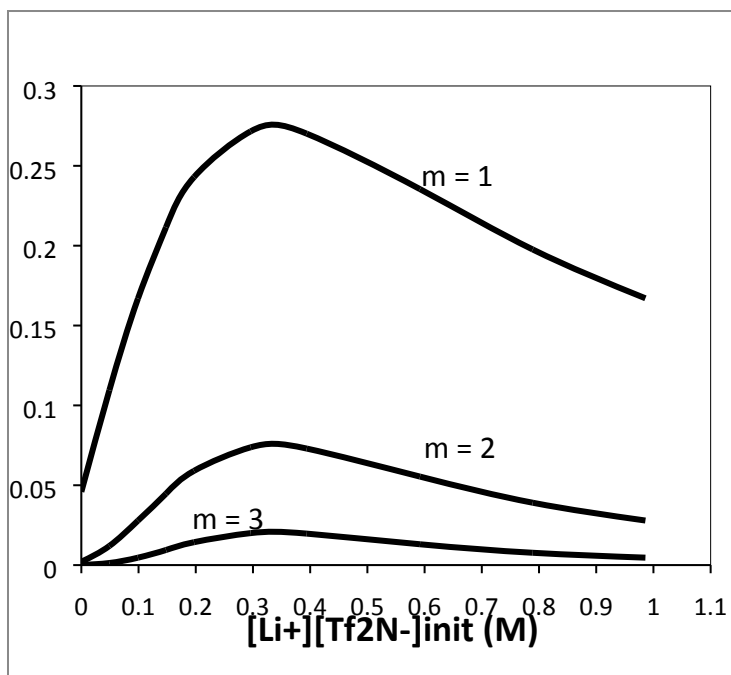

Fig. S3: Predicted variation of D as a function of added  $[\text{Li}^+][\text{Tf}_2\text{N}^-]$  salt in case of cation exchange.  $[\text{D}^+][\text{NO}_3^-] = 0.305$  M.

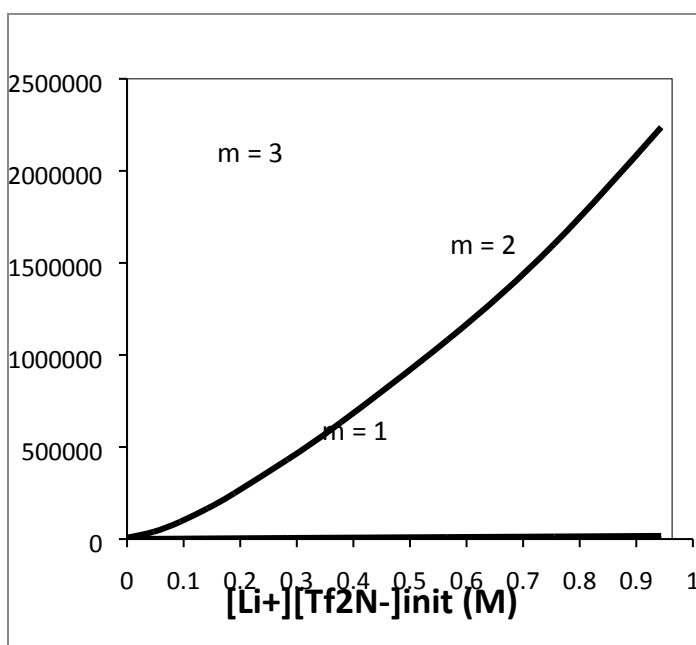

Fig. S4: Predicted variation of D as a function of added  $[\text{Li}^+][\text{Tf}_2\text{N}^-]$  salt in case of cation exchange.  $[\text{D}^+][\text{NO}_3^-] = 2.2$  M.

## References

1. R. K. Harris, E. D. Becker, S. M. C. d. Menezes, R. Goodfellow and P. Granger, *Pure Appl. Chem.*, 2001, **73**, 1795.
2. G. F. Pauli, B. U. Jaki and D. C. Lankin, *J. Nat. Prod.*, 2005, **68**, 133.
3. R. A. d. Graaf and K. L. Behar, *Anal. Chem.*, 2003, **75**, 2100.
4. T. J. Bell and Y. Ikeda, *Dalton Trans.*, 2011, **40**, 10125.
5. M. Malet-Martino and U. Holzgrabe, *J. Pharm. Biomed. Anal.*, 2011, **55**, 1.

6. C. Gaillard, O. Klimchuk, A. Ouadi, I. Billard and C. Hennig, *Dalton Trans.*, 2012, **41**, 5476.
7. F. Malz and H. Jancke, *J. Pharm. Biomed. Anal.*, 2005, **38**, 813.
